# Supplementary material
Source: PubMed Central journal article supplement (PMC3189010)
Supplement: Supp_Data.pdf [file Supp_Data.pdf]

## Supplementary Data

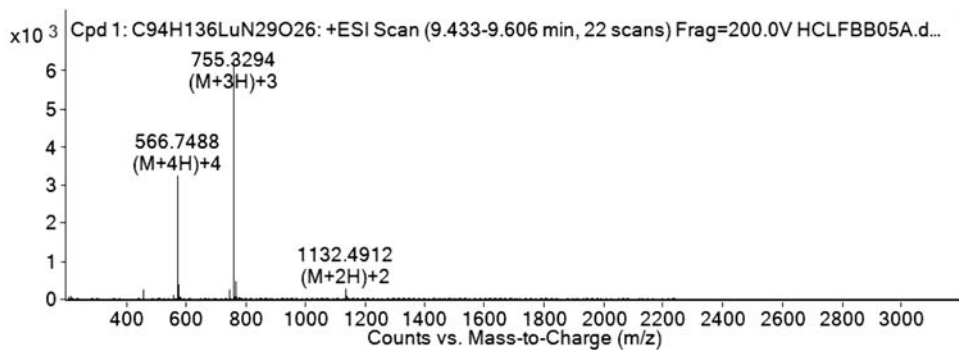

### +2 charge state region

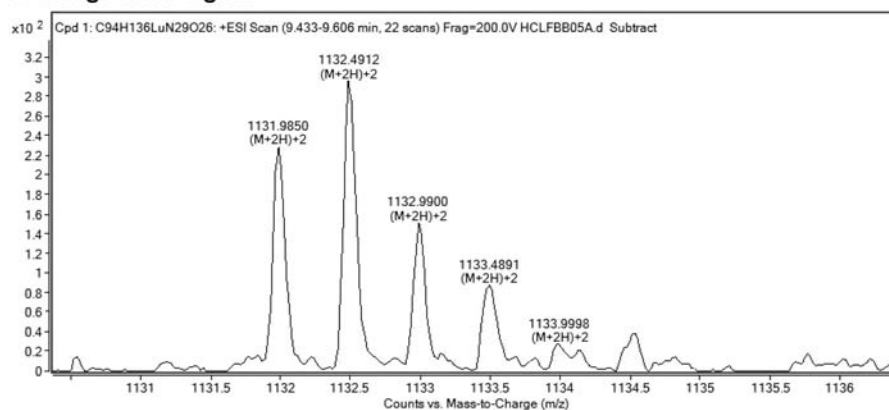

### +3 charge state region

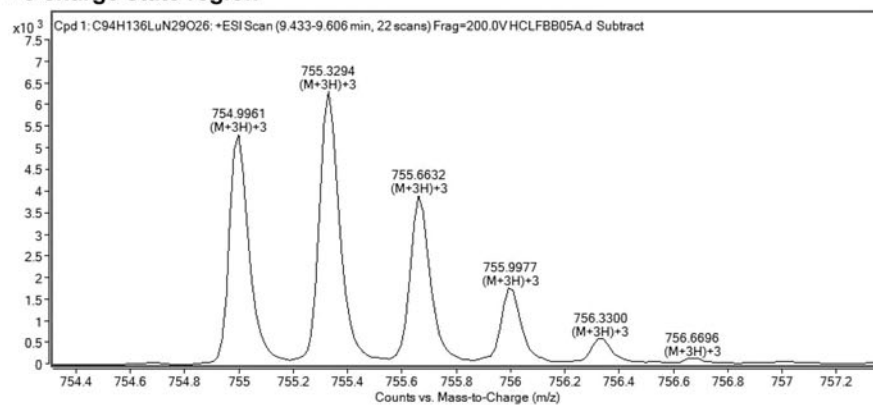

### +4 charge state region

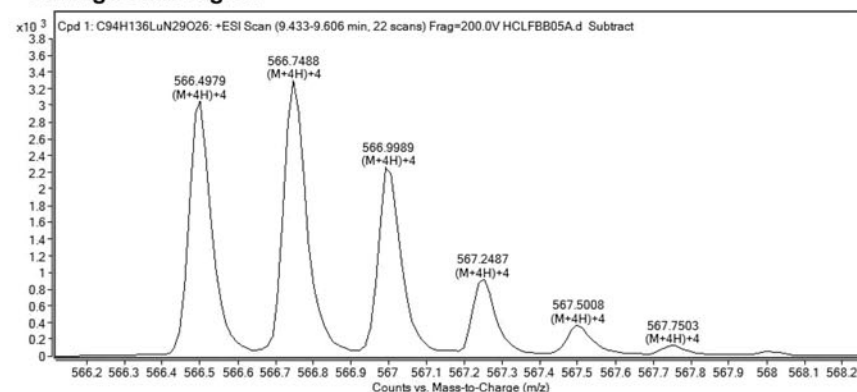

SUPPLEMENTARY FIG. S1. Electrospray mass spectral data of <sup>nat</sup>Lu-DO3A-4B4 (molecular formula: C<sub>94</sub>H<sub>136</sub>LuN<sub>29</sub>O<sub>26</sub>; exact mass=2261.9619).

SUPPLEMENTARY TABLE S1. ELECTROSPRAY MASS SPECTROMETRY OBSERVED AND CALCULATED PEAK LIST FOR +4, +3, AND +2 CHARGE STATE REGIONS (DATA TABLE FROM AGILENT MASS HUNTER QUALITATIVE ANALYSIS COMPOUND REPORT)

| <i>MS spectrum peak list</i> |                 |                   |          |              |                     |            |
|------------------------------|-----------------|-------------------|----------|--------------|---------------------|------------|
| <i>m/z</i>                   | <i>Calc m/z</i> | <i>Diff (ppm)</i> | <i>z</i> | <i>Abund</i> | <i>Formula</i>      | <i>Ion</i> |
| <b>+ 4 charge region</b>     |                 |                   |          |              |                     |            |
| 566.4979                     | 566.4978        | 0.23              | 4        | 3088         | C94 H140 Lu N29 O26 | (M+4H)+4   |
| 566.7488                     | 566.7485        | 0.55              | 4        | 3299         | C94 H140 Lu N29 O26 | (M+4H)+4   |
| 566.9989                     | 566.9991        | -0.39             | 4        | 2304         | C94 H140 Lu N29 O26 | (M+4H)+4   |
| 567.2487                     | 567.2498        | -1.92             | 4        | 930          | C94 H140 Lu N29 O26 | (M+4H)+4   |
| 567.5008                     | 567.5004        | 0.65              | 4        | 372          | C94 H140 Lu N29 O26 | (M+4H)+4   |
| 567.7503                     | 567.7511        | -1.37             | 4        | 126          | C94 H140 Lu N29 O26 | (M+4H)+4   |
| <b>+ 3 charge region</b>     |                 |                   |          |              |                     |            |
| 754.9961                     | 754.9946        | 2.01              |          | 5343         | C94 H139 Lu N29 O26 | (M+3H)+3   |
| 755.3294                     | 755.3288        | 0.75              |          | 6314         | C94 H139 Lu N29 O26 | (M+3H)+3   |
| 755.6632                     | 755.6631        | 0.14              |          | 3914         | C94 H139 Lu N29 O26 | (M+3H)+3   |
| 755.9977                     | 755.9973        | 0.6               |          | 1809         | C94 H139 Lu N29 O26 | (M+3H)+3   |
| 756.33                       | 756.3315        | -1.97             |          | 616          | C94 H139 Lu N29 O26 | (M+3H)+3   |
| 756.6696                     | 756.6657        | 5.18              |          | 158          | C94 H139 Lu N29 O26 | (M+3H)+3   |
| <b>+ 2 charge region</b>     |                 |                   |          |              |                     |            |
| 1131.985                     | 1131.9882       | -2.81             | 2        | 229          | C94 H138 Lu N29 O26 | (M+2H)+2   |
| 1132.4912                    | 1132.4896       | 1.39              | 2        | 297          | C94 H138 Lu N29 O26 | (M+2H)+2   |
| 1132.99                      | 1132.991        | -0.86             | 2        | 153          | C94 H138 Lu N29 O26 | (M+2H)+2   |

SUPPLEMENTARY TABLE S2. DATA FOR OPTIMIZATION OF THE RADIOLABELING YIELD

| <i>pH</i>               | <i>% complex</i> | <i>Standard deviation</i> | <i>Time study (min)</i>          | <i>% complex</i> | <i>Standard deviation</i> |
|-------------------------|------------------|---------------------------|----------------------------------|------------------|---------------------------|
| 4                       | 56.99            | 3.24                      | 15                               | 25.73            | 4.23                      |
| 5                       | 70.32            | 2.98                      | 30                               | 50.83            | 3.69                      |
| 6                       | 95.38            | 2.39                      | 45                               | 63.61            | 3.64                      |
| 7                       | 89.42            | 2.56                      | 60                               | 94.98            | 2.34                      |
| 8                       | 83.58            | 4.23                      | 90                               | 99.42            | 1.81                      |
| <i>Temperature (°C)</i> | <i>% complex</i> | <i>Standard deviation</i> | <i>Ligand concentration (μM)</i> | <i>% complex</i> | <i>Standard deviation</i> |
| 25                      | 32.10            | 4.23                      | 0.01                             | 18.13            | 4.23                      |
| 37                      | 94.51            | 1.28                      | 0.1                              | 71.74            | 2.77                      |
| 60                      | 96.78            | 2.14                      | 1                                | 97.84            | 2.44                      |
| 90                      | 98.26            | 2.21                      | 10                               | 100.00           | 1.51                      |

SUPPLEMENTARY TABLE S3. CELL BINDING ASSAY DATA

| <i><sup>177</sup>Lu-DO3A-4B4 binding assay</i> |                                  |      |                |                   |     |                |                                  |     |                |
|------------------------------------------------|----------------------------------|------|----------------|-------------------|-----|----------------|----------------------------------|-----|----------------|
| <i>Cells (10<sup>6</sup>)</i>                  | <i><sup>177</sup>Lu-DO3A-4B4</i> |      | <i>Average</i> | <i>Preblocked</i> |     | <i>Average</i> | <i><sup>177</sup>Lu-DO3A-PA1</i> |     | <i>Average</i> |
| 0                                              | 0                                | 0    | 0              | 0                 | 0   | 0              | 0                                | 0   | 0              |
| 0.25                                           | 49.7                             | 46   | 47.85          | 2.1               | 1.5 | 1.8            | 2.2                              | 1.9 | 2.05           |
| 0.5                                            | 55.5                             | 51.1 | 53.3           | 2.8               | 3.1 | 2.95           | 1.9                              | 2.1 | 2              |
| 1                                              | 64.6                             | 60   | 62.3           | 5.3               | 6.1 | 5.7            | 1.8                              | 2.3 | 2.05           |
| 2                                              | 69.4                             | 65.3 | 67.35          | 11                | 13  | 12             | 2.3                              | 1.3 | 1.8            |
| <i><sup>153</sup>Sm-DO3A-4B4 binding assay</i> |                                  |      |                |                   |     |                |                                  |     |                |
| <i>Cells (10<sup>6</sup>)</i>                  | <i><sup>153</sup>Sm-DO3A-4B4</i> |      | <i>Average</i> | <i>Preblocked</i> |     | <i>Average</i> | <i><sup>153</sup>Sm-DO3A-PA1</i> |     | <i>Average</i> |
| 0                                              | 0                                | 0    | 0              | 0                 | 0   | 0              | 0                                | 0   | 0              |
| 0.25                                           | 15.9                             | 19.1 | 17.5           | 2                 | 1.8 | 1.9            | 0.9                              | 0.9 | 0.9            |
| 0.5                                            | 23.1                             | 22.8 | 22.95          | 2.6               | 2.1 | 2.35           | 1.1                              | 0.6 | 0.85           |
| 1                                              | 38.1                             | 40.3 | 39.2           | 3.3               | 3.2 | 3.25           | 1                                | 1   | 1              |
| 2                                              | 46.5                             | 51   | 48.75          | 6.5               | 6   | 6.25           | 1.8                              | 1.6 | 1.7            |
| <i><sup>166</sup>Ho-DO3A-4B4 binding assay</i> |                                  |      |                |                   |     |                |                                  |     |                |
| <i>Cells (10<sup>6</sup>)</i>                  | <i><sup>166</sup>Ho-DO3A-4B4</i> |      | <i>Average</i> | <i>Preblocked</i> |     | <i>Average</i> | <i><sup>166</sup>Ho-DO3A-PA1</i> |     | <i>Average</i> |
| 0                                              | 0                                | 0    | 0              | 0                 | 0   | 0              | 0                                | 0   | 0              |
| 0.25                                           | 15                               | 16.2 | 15.6           | 2.8               | 2.7 | 2.75           | 3.6                              | 4.8 | 4.2            |
| 0.5                                            | 24.5                             | 22.6 | 23.55          | 3.4               | 5.2 | 4.3            | 4.3                              | 4.3 | 4.3            |
| 1                                              | 27                               | 28.5 | 27.75          | 5.8               | 4.2 | 5              | 7.1                              | 8.2 | 7.65           |
| 2                                              | 44.6                             | 39.8 | 42.2           | 7.9               | 6.3 | 7.1            | 6.6                              | 7.7 | 7.15           |

Data show % radioactivity bound to cells.
